# Supplementary material for: FAAP100 is required for the resolution of transcription-replication conflicts in primordial germ cells
Source: PubMed Central journal article supplement (PMC10426154; doi:10.1186/s12915-023-01676-1), 2023-08-15

**A**

| Distribution of genotypes among offsprings of <i>Faap100</i> <sup>+/-</sup> intercross |                  |                                       |                                       |                                       |
|----------------------------------------------------------------------------------------|------------------|---------------------------------------|---------------------------------------|---------------------------------------|
| Groups                                                                                 | Total offsprings | Genotypes <i>P</i> =0.93              |                                       |                                       |
|                                                                                        |                  | <i>Faap100</i> <sup>+/+</sup><br>N(%) | <i>Faap100</i> <sup>+/-</sup><br>N(%) | <i>Faap100</i> <sup>-/-</sup><br>N(%) |
| Observed                                                                               | 218              | 58(26.61)                             | 107(49.08)                            | 53(24.31)                             |
| Expected                                                                               |                  | 54.5(25)                              | 109(50)                               | 54.5(25)                              |

**B**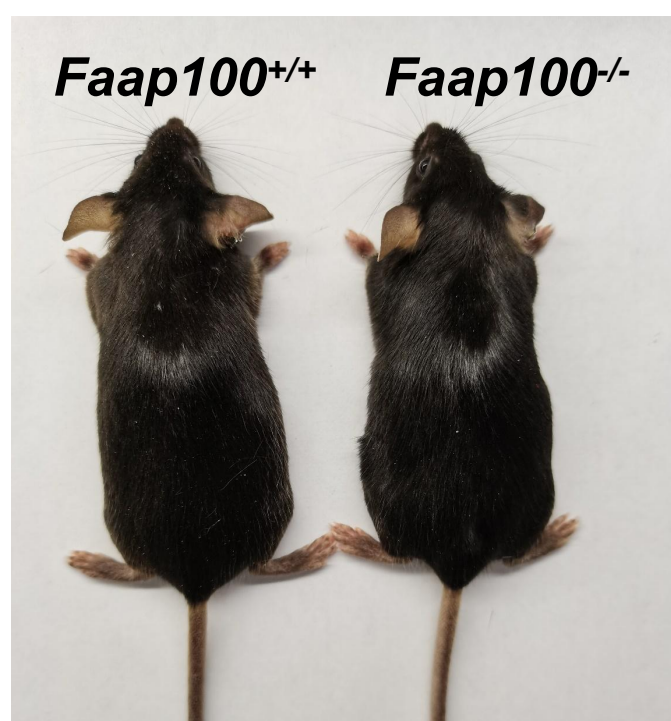**C**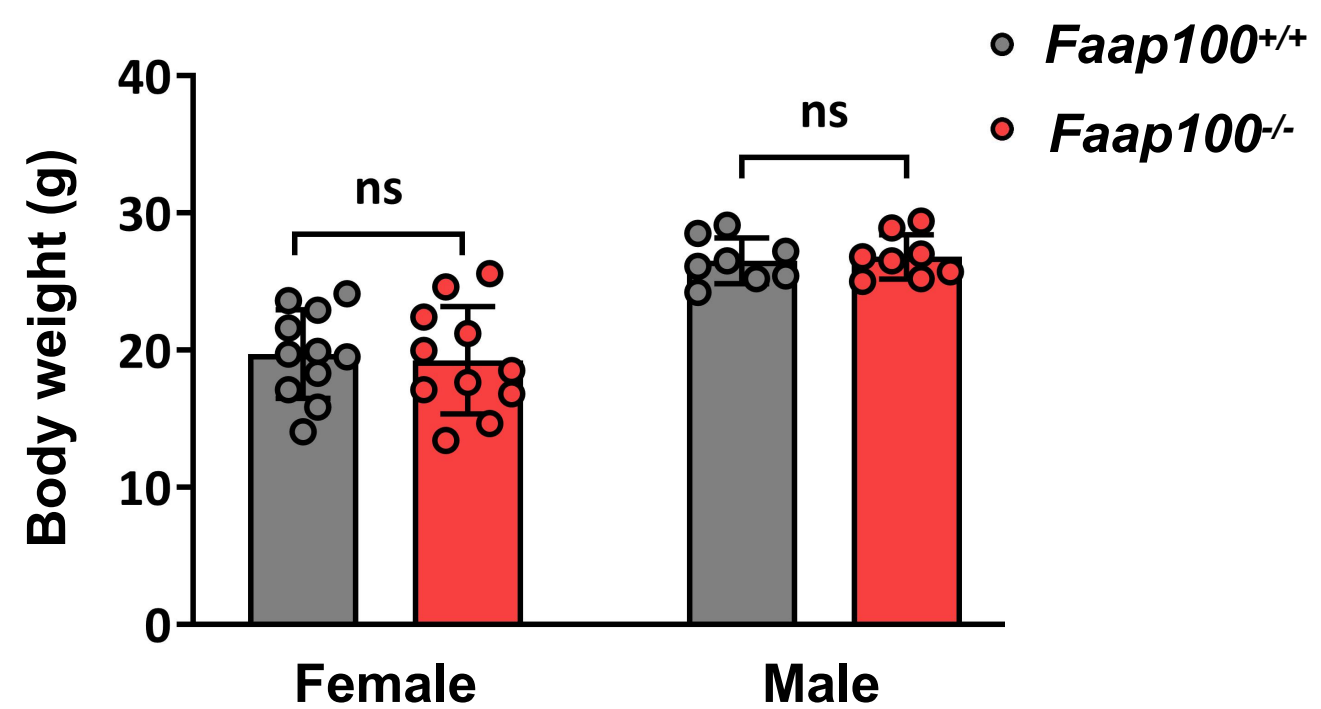**D**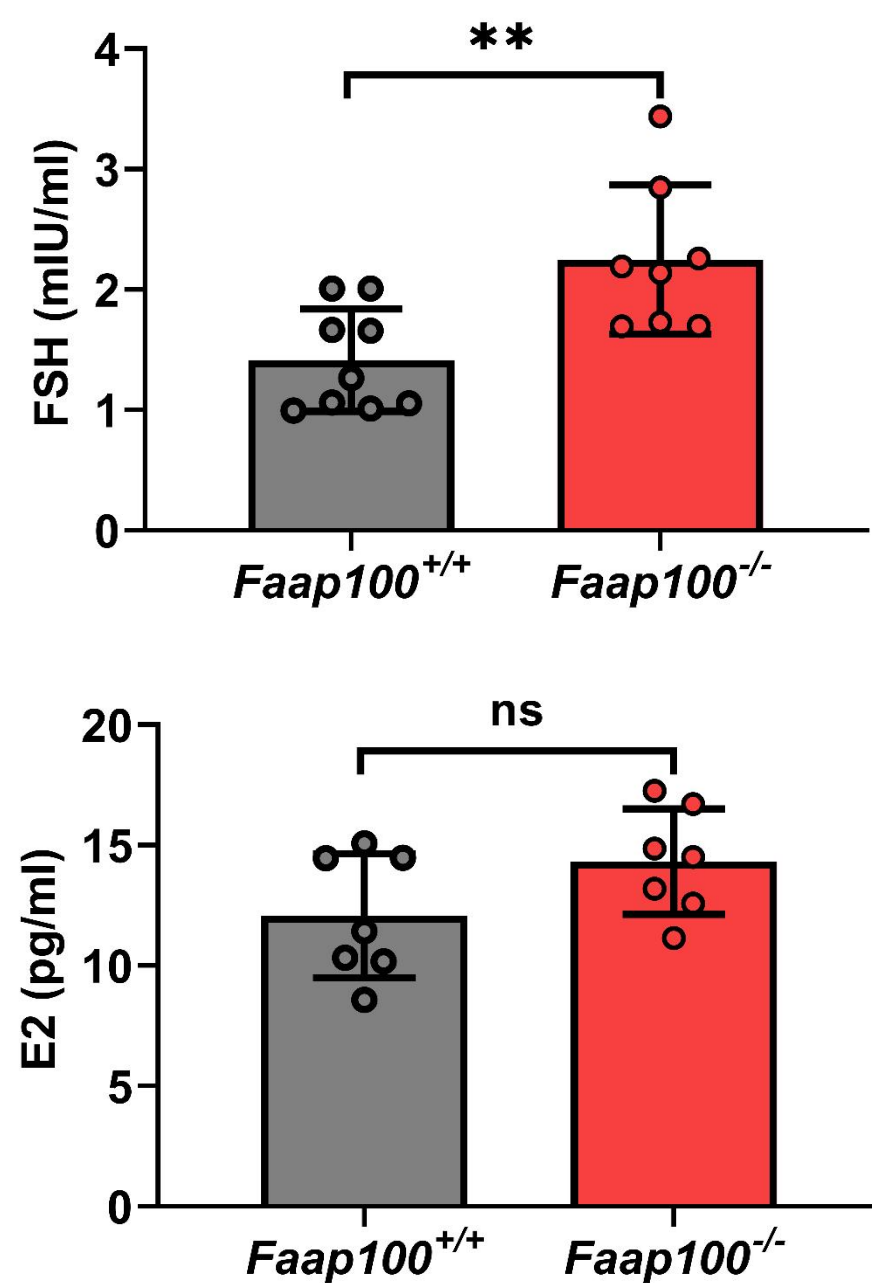**E**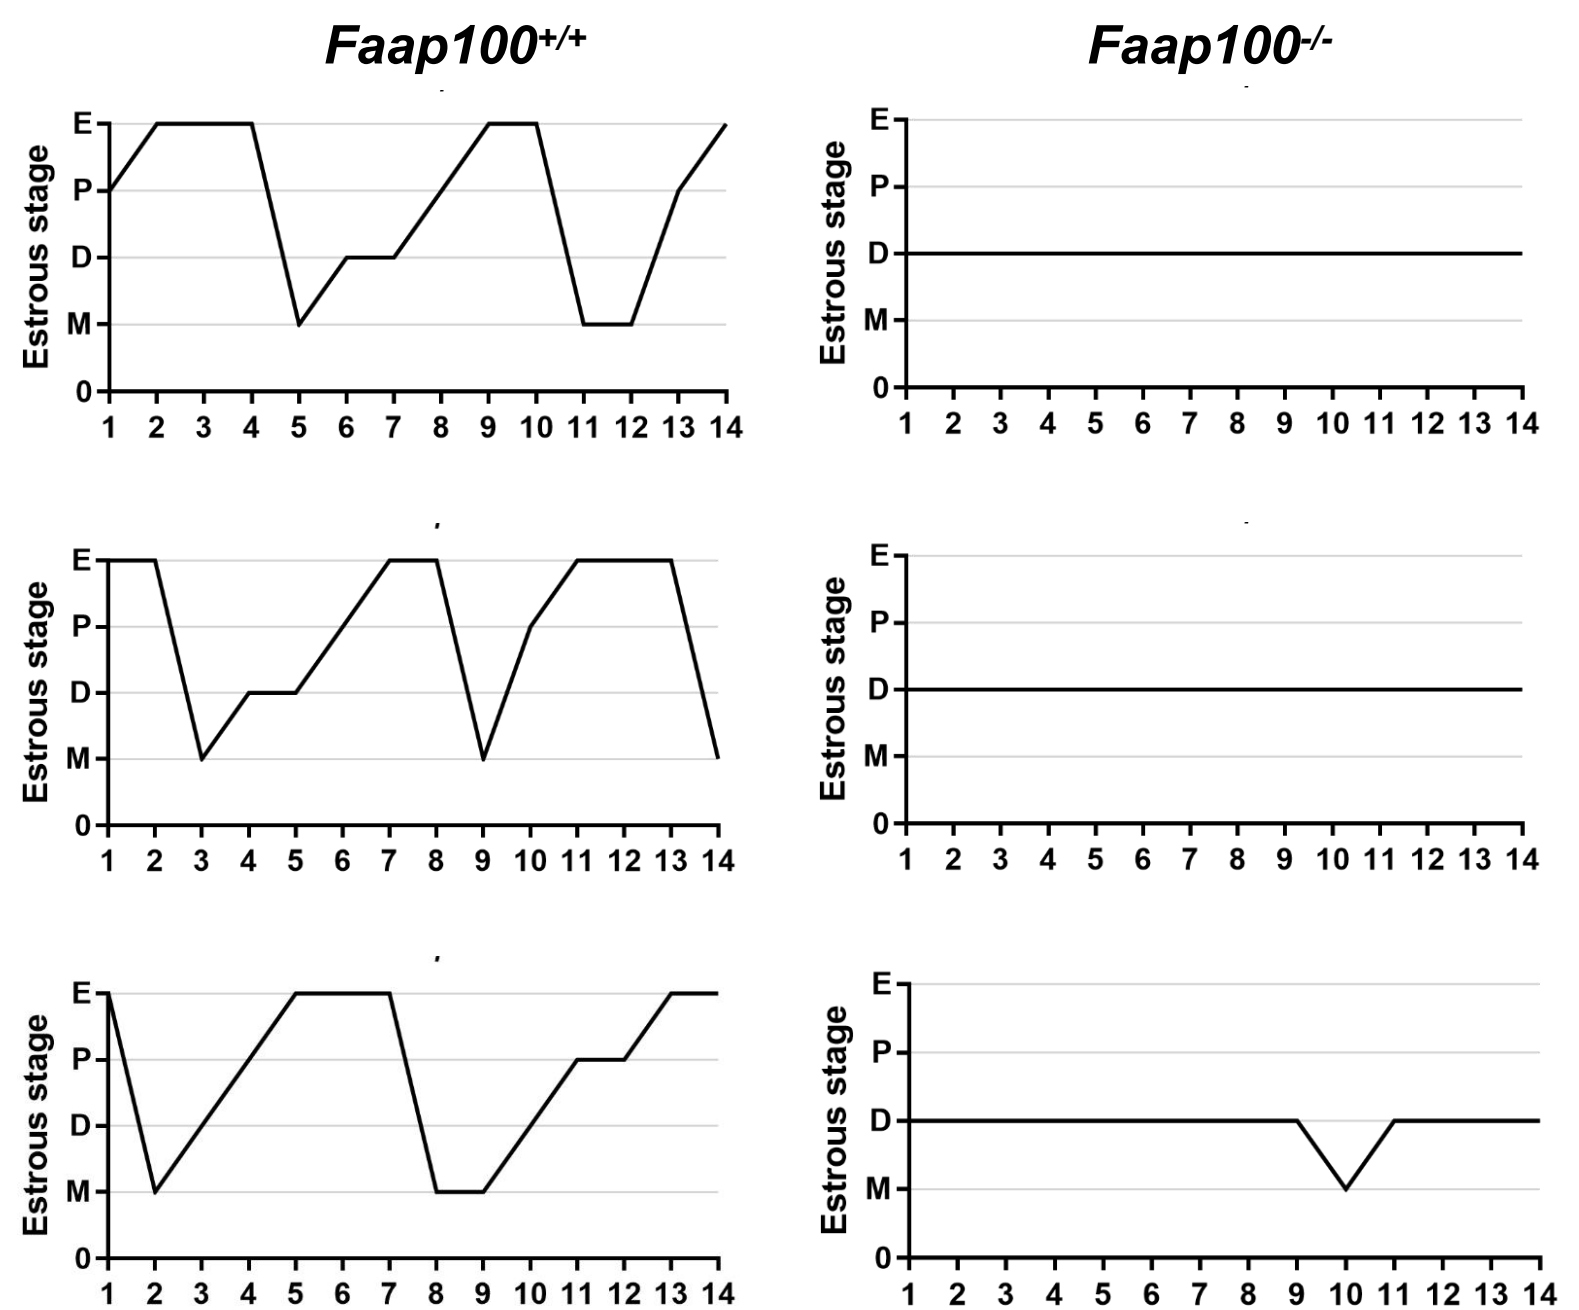

Supplement: 12915_2023_1676_MOESM2_ESM.pdf [file 12915_2023_1676_MOESM2_ESM.pdf]
