# Supplementary material for: FAAP100 is required for the resolution of transcription-replication conflicts in primordial germ cells
Source: PubMed Central journal article supplement (PMC10426154; doi:10.1186/s12915-023-01676-1), 2023-08-15

**A**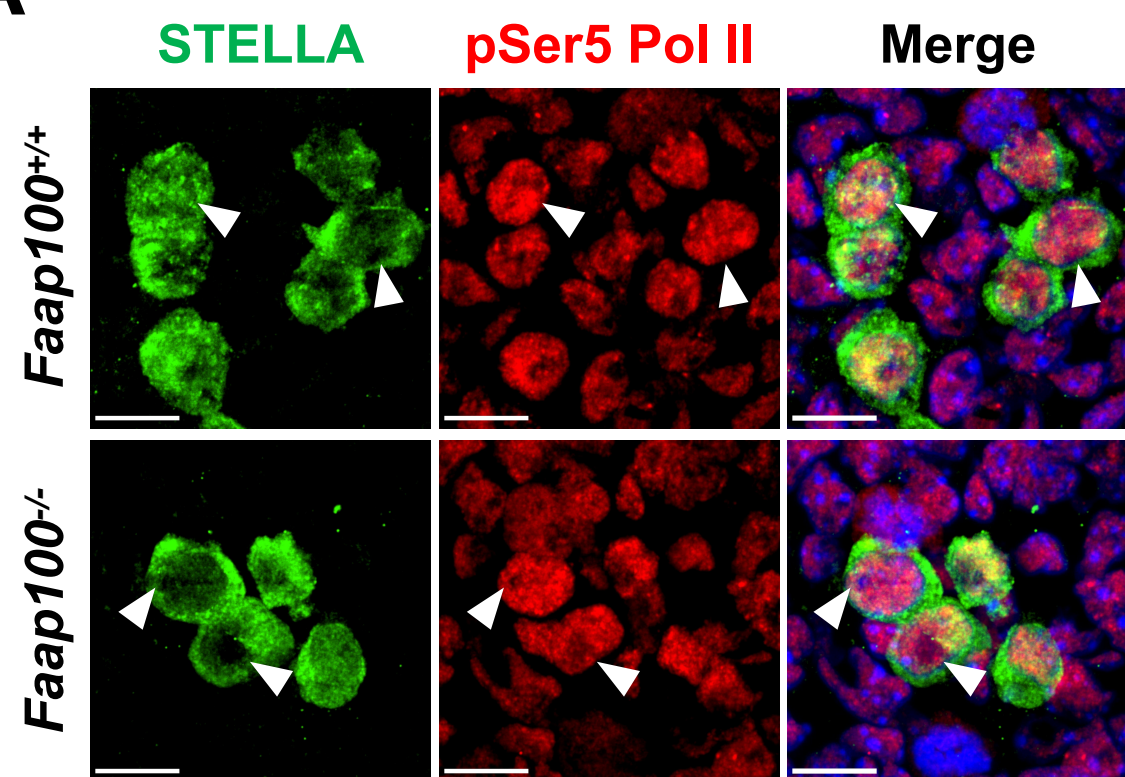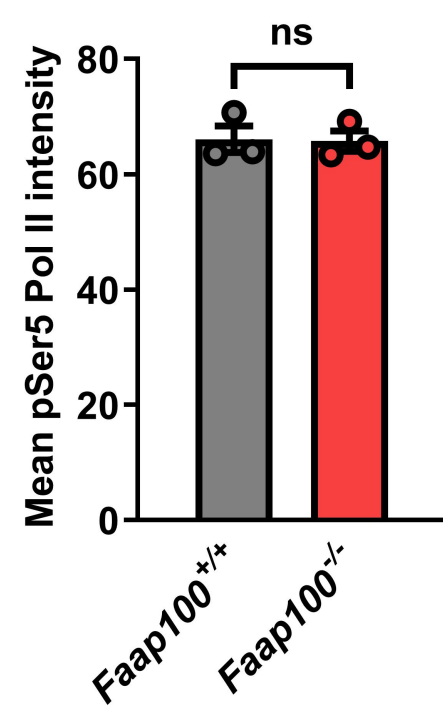**B**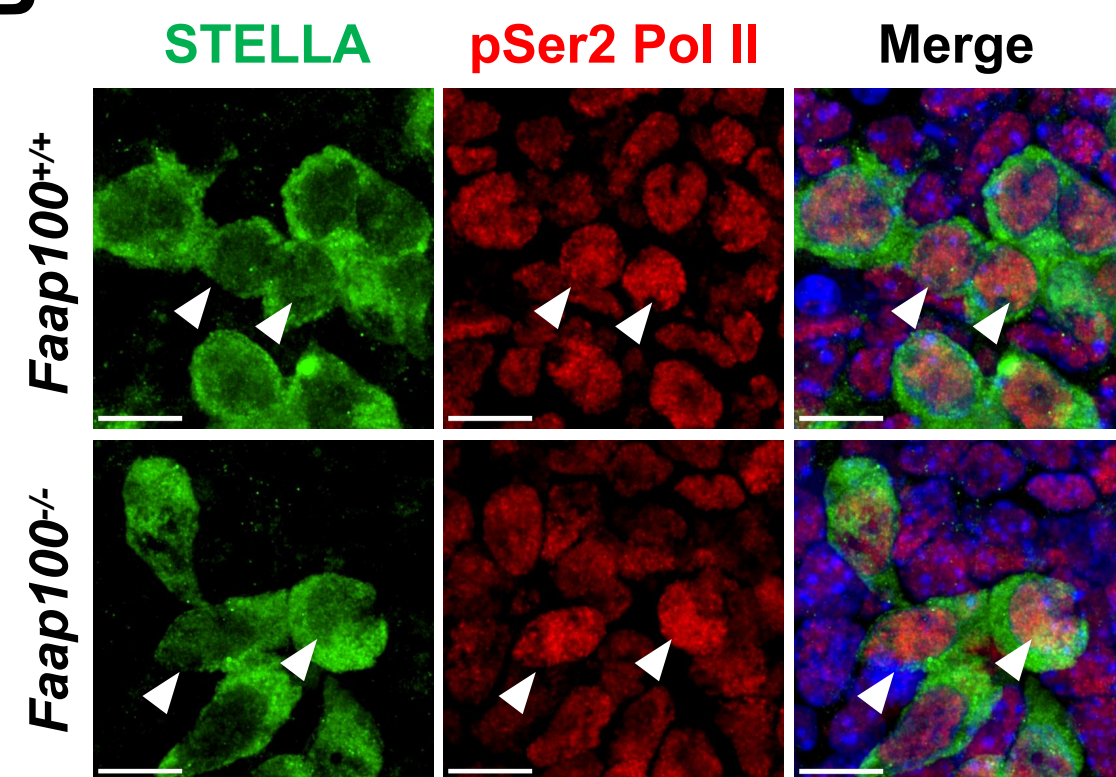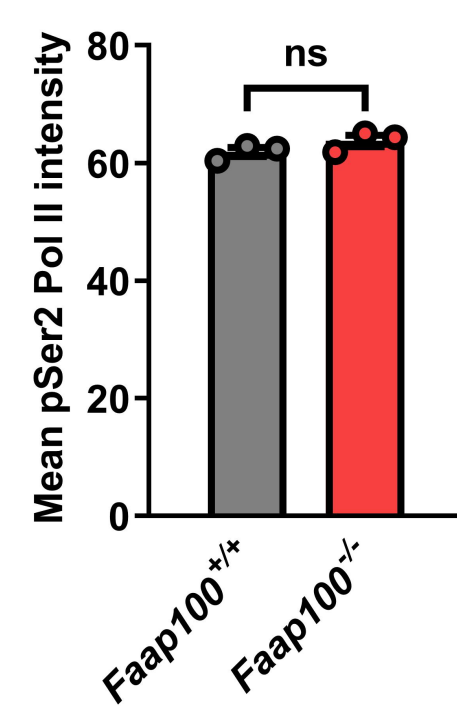**C**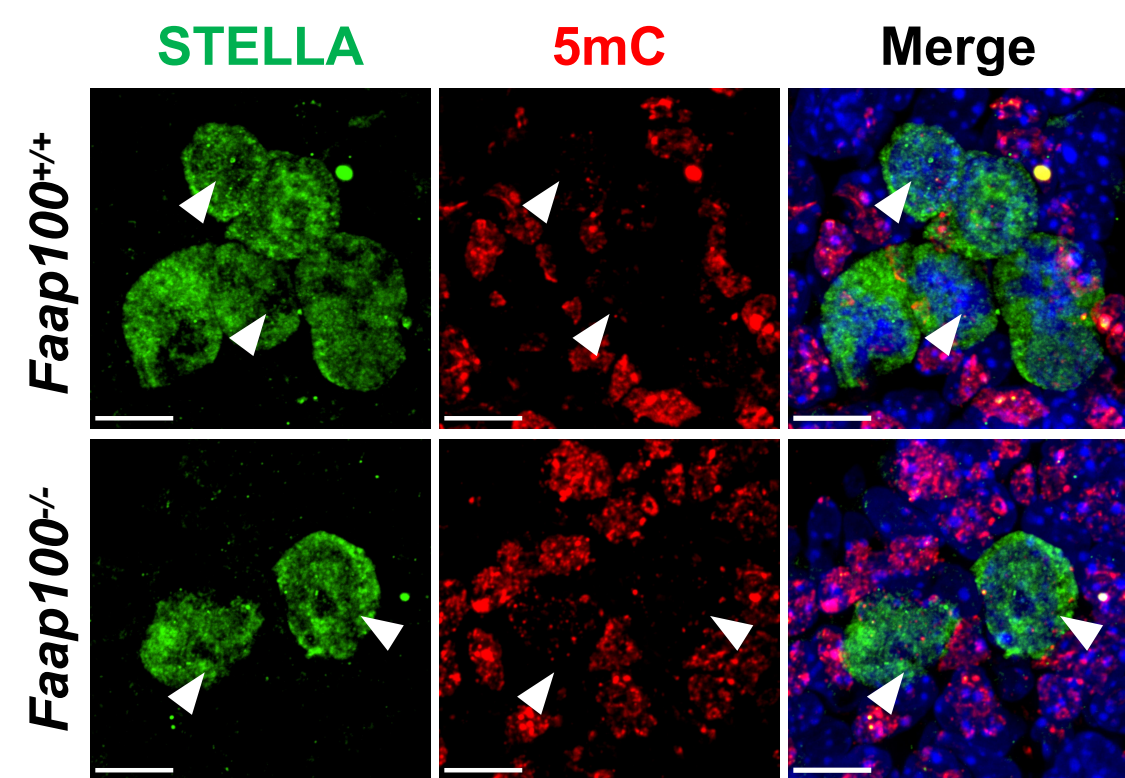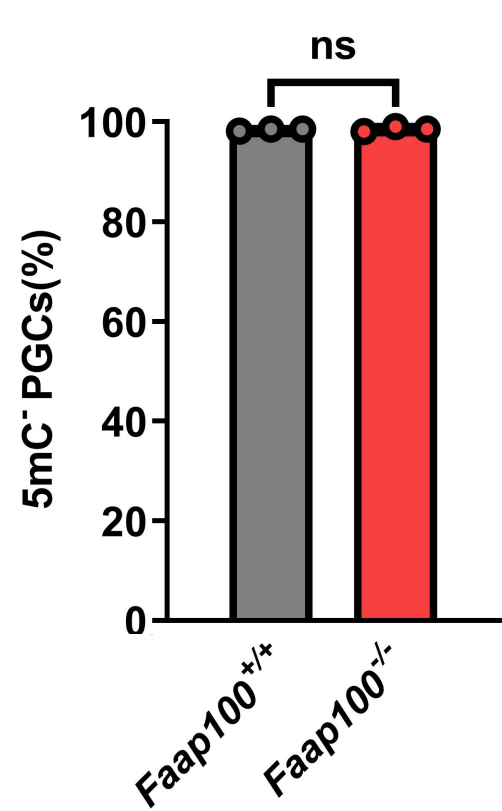**D**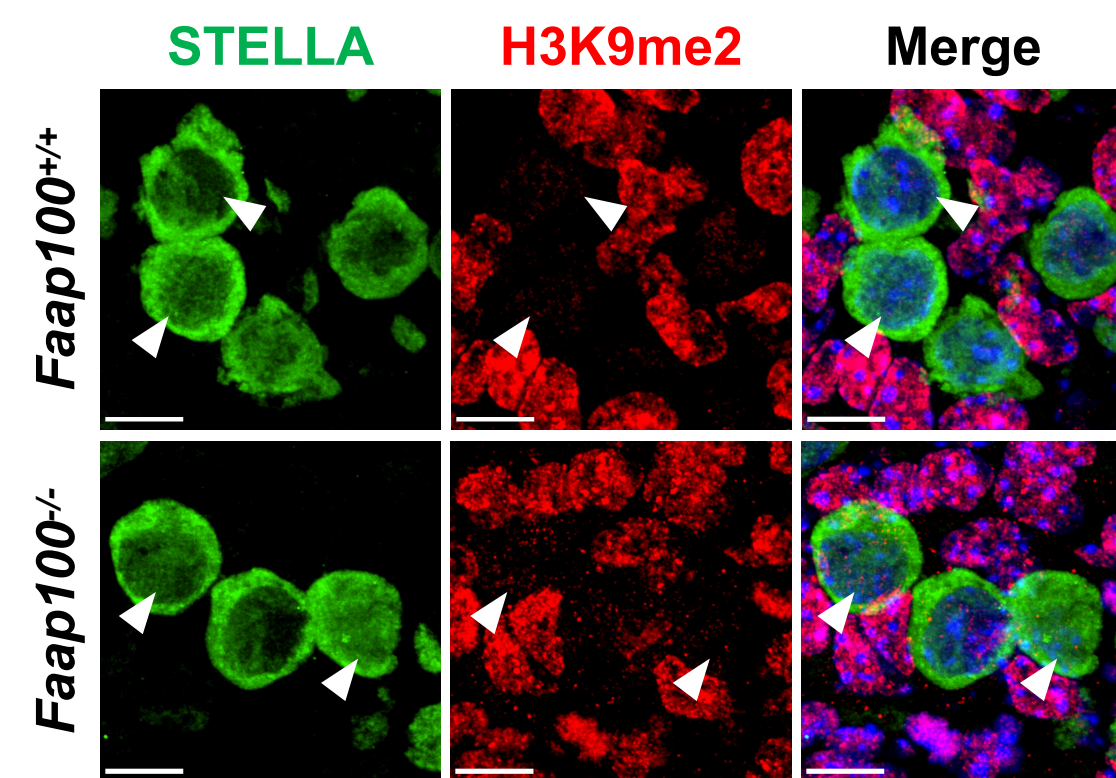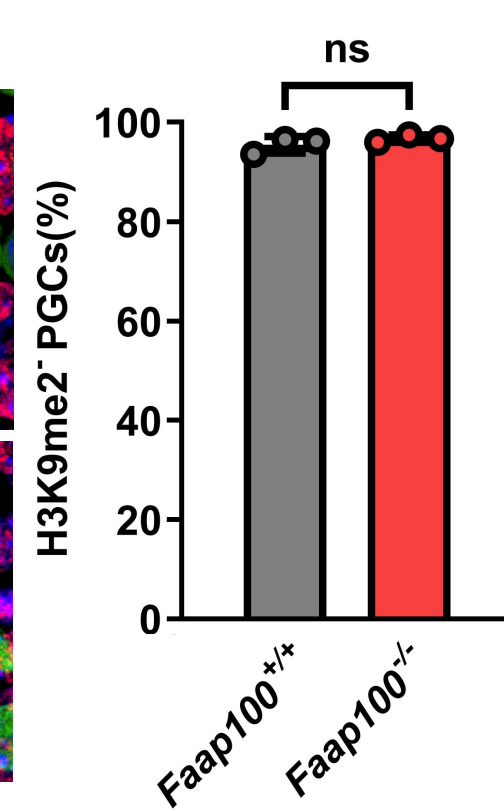**E**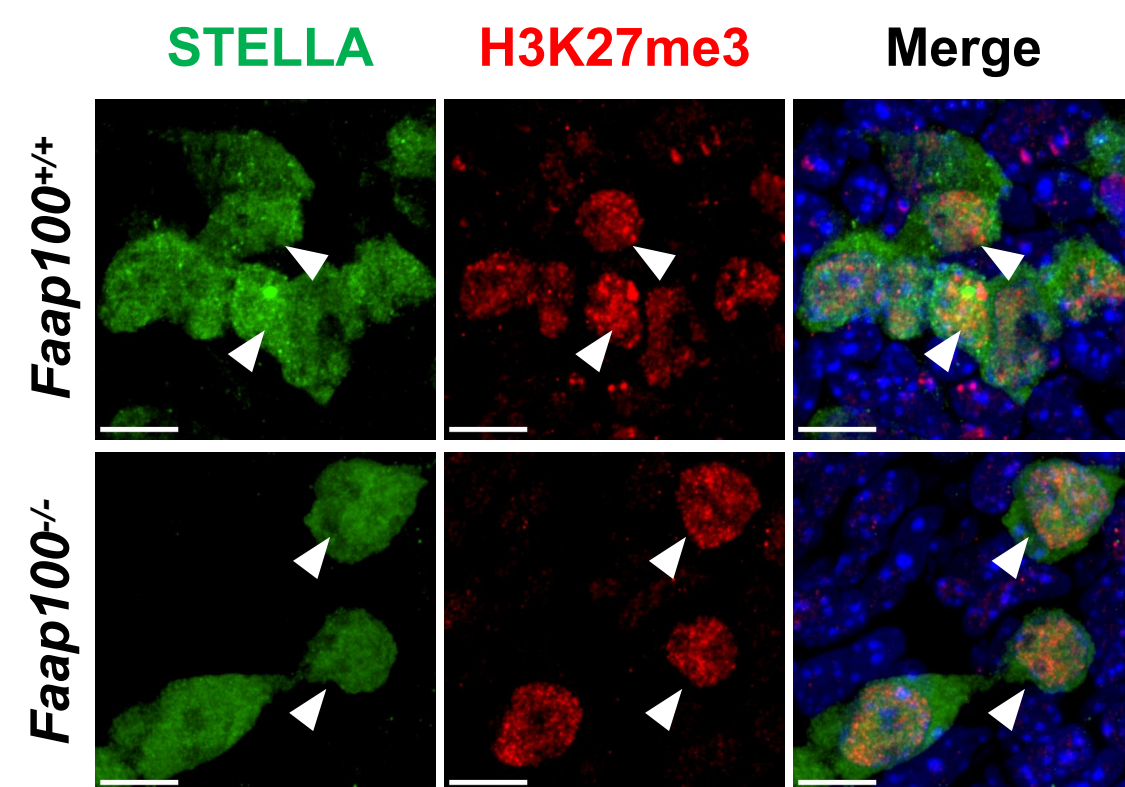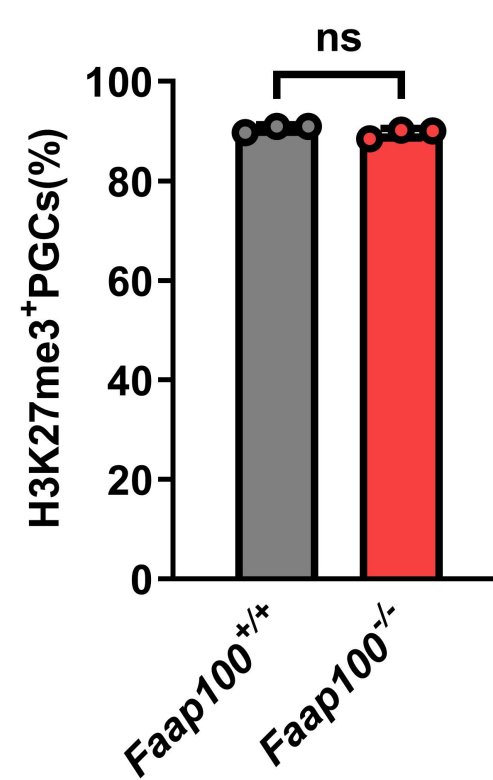

Supplement: 12915_2023_1676_MOESM3_ESM.pdf [file 12915_2023_1676_MOESM3_ESM.pdf]
