# Supplementary material for: FAAP100 is required for the resolution of transcription-replication conflicts in primordial germ cells
Source: PubMed Central journal article supplement (PMC10426154; doi:10.1186/s12915-023-01676-1), 2023-08-15
Supplement: 12915_2023_1676_MOESM5_ESM.pdf [file 12915_2023_1676_MOESM5_ESM.pdf]

**Table S1. Sequences of PCR primers used for genotyping.**

| Primer             | Sequence (5'-3')          |
|--------------------|---------------------------|
| <i>Faap100</i> -F1 | TGTGAGAGGTTTGTCCCAGTAGTAG |
| <i>Faap100</i> -F2 | GTTGGACCACCAAAGGACGATG    |
| <i>Faap100</i> -R  | GACAACAGTATCAGGATGACAGGC  |
| <i>p53</i> -F1     | GCTTTCCCACCCTCGCATAAG     |
| <i>p53</i> -F2     | CCATAAGACAGGTGCTCCTCCAC   |
| <i>p53</i> -R      | TTCACTACAAAGGCTGAGCTGGAG  |
