# Supplementary material for: FAAP100 is required for the resolution of transcription-replication conflicts in primordial germ cells
Source: PubMed Central journal article supplement (PMC10426154; doi:10.1186/s12915-023-01676-1), 2023-08-15
Supplement: 12915_2023_1676_MOESM6_ESM.pdf [file 12915_2023_1676_MOESM6_ESM.pdf]

**Table S2. Antibodies.**

| Antibody (clone)                                   | Catalog number  | Company                   | Dilution rate              |
|----------------------------------------------------|-----------------|---------------------------|----------------------------|
| STELLA (Polyclonal)                                | AF2566          | R&D systems               | 1:40 (IF)                  |
| DDX4 (mAbcam27591)                                 | ab27591         | Abcam                     | 1:200(IF)<br>1: 5000 (IHC) |
| FOXL2 (Polyclonal)                                 | ab5096          | Abcam                     | 1:200 (IF)                 |
| SOX9 (Polyclonal)                                  | AB5535          | Millipore                 | 1:200 (IF)                 |
| Cleaved PARP1 (D6X6X)                              | 94885           | Cell signaling technology | 1:200 (IF)                 |
| Ki67 (Polyclonal)                                  | ab15580         | Abcam                     | 1:300 (IF)                 |
| Cyclin B1 (Polyclonal)                             | 4138            | Cell signaling technology | 1:200 (IF)                 |
| pSer5 Pol II (EPR19015)                            | ab193467        | Abcam                     | 1:100 (IF)                 |
| pSer2 Pol II (EPR18855)                            | ab193468        | Abcam                     | 1:200 (IF)                 |
| 5mC (RM231)                                        | ab214727        | Abcam                     | 1:500 (IF)                 |
| H3K9me2 (Polyclonal)                               | 07-441          | Millipore                 | 1:500 (IF)                 |
| H3K27me3 (Polyclonal)                              | 07-449          | Millipore                 | 1:500 (IF)                 |
| FANCD2 (EPR2302)                                   | ab108928        | Abcam                     | 1:300 (IF)<br>1:1000 (WB)  |
| 53BP1 (Polyclonal)                                 | NB100-304       | Novus biologicals         | 1:500 (IF)                 |
| p-p53 (D4S1H)                                      | 12571           | Cell signaling technology | 1:100 (IF)<br>1:1000 (WB)  |
| RPA2 (EPR2877Y)                                    | ab76420         | Abcam                     | 1:1000 (WB)                |
| RPA2-S4/8-p (Polyclonal)                           | A300-245A       | Bethyl                    | 1:5000 (WB)                |
| $\gamma$ H2AX (JBW301)                             | 05-636          | Millipore                 | 1:1000 (WB)                |
| p53 (2H9O)                                         | 32532s          | Cell signaling technology | 1:1000 (WB)                |
| $\beta$ -ACTIN (2D4H5)                             | 66009-1-1g      | Proteintech               | 1:3000 (WB)                |
| Pol II (8WG16)                                     | ab817           | Abcam                     | 1:100 (IF)                 |
| Pol II (Polyclonal)                                | ab26721         | Abcam                     | 1:200 (IF)                 |
| PCNA (PC10)                                        | SC-56           | Santa cruz biotechnology  | 1:50 (IF)                  |
| PCNA (D3H8P)                                       | 13110           | Cell signaling technology | 1:500 (IF)                 |
| S9.6 (Polyclonal)                                  | Kf-Ab01137-23.0 | Kerafast                  | 1:200 (IF)                 |
| Fibrillarin (38F3)                                 | Ab4566          | Abcam                     | 1:500 (IF)                 |
| BrdU (BU1/75 (ICR1))                               | Ab6326          | Abcam                     | 1:200 (IF)                 |
| BrdU (B44)                                         | 347580          | BD Biosciences            | 1:50 (IF)                  |
| Donkey anti-Goat Alexa Fluor Plus 488 (polyclonal) | A32814          | Invitrogen                | 1:500 (IF)                 |
| Donkey anti-Goat Alexa Fluor Plus 555 (polyclonal) | A32816          | Invitrogen                | 1:500 (IF)                 |

|                                                      |        |            |            |
|------------------------------------------------------|--------|------------|------------|
| Donkey anti-Rabbit Alexa Fluor Plus 555 (polyclonal) | A32794 | Invitrogen | 1:500 (IF) |
| Donkey anti-Rabbit Alexa Fluor Plus 647 (polyclonal) | A32795 | Invitrogen | 1:500 (IF) |
| Donkey anti-Mouse Alexa Fluor Plus 488 (polyclonal)  | A32766 | Invitrogen | 1:500 (IF) |
| Donkey anti-Mouse Alexa Fluor Plus 555 (polyclonal)  | A31570 | Invitrogen | 1:500 (IF) |
| Donkey anti-Rat Alexa Fluor Plus 488 (polyclonal)    | A48269 | Invitrogen | 1:500 (IF) |
