# Supplementary material for: FAAP100 is required for the resolution of transcription-replication conflicts in primordial germ cells
Source: PubMed Central journal article supplement (PMC10426154; doi:10.1186/s12915-023-01676-1), 2023-08-15
Supplement: 12915_2023_1676_MOESM7_ESM.pdf [file 12915_2023_1676_MOESM7_ESM.pdf]

**Table S3. Reagents for assays.**

| Reagent                                    | Catalog number | Company                   |
|--------------------------------------------|----------------|---------------------------|
| RNAscope® 2.5 HD Reagent Kit-RED           | 322350         | Advanced cell diagnostics |
| Duolink insitu PLA probe anti-rabbit minus | DUO92005       | Sigma                     |
| Duolink insitu PLA probe anti-mouse plus   | DUO92001       | Sigma                     |
| Duolink insitu detection reagents red      | DUO92008       | Sigma                     |
| Cell-Light EdU Apollo643 In Vitro Kit      | C10310-2       | Ribobio                   |
| KAPA Mouse Genotyping Kit                  | KK7351         | Sigma                     |
| 1-Naphthyl phosphate, disodium salt        | N7255          | Sigma                     |
| Fast Red TR salt                           | F6760          | Sigma                     |
| 5-ethynyl-2'-deoxyuridine (EdU)            | 900584         | Sigma                     |
| Mitomycin C (MMC)                          | M2320          | TCI                       |
| Aphidicolin (APH)                          | 504744         | Sigma                     |
| Hydroxyuria (HU)                           | H8627          | Sigma                     |
| 5-iodo-2'-deoxyuridine (IdU)               | I7125          | Sigma                     |
| 5-Chloro-2'-deoxy-uridine (CldU)           | C6891          | Sigma                     |
