# Supplementary material for: FAAP100 is required for the resolution of transcription-replication conflicts in primordial germ cells
Source: PubMed Central journal article supplement (PMC10426154; doi:10.1186/s12915-023-01676-1), 2023-08-15

**Fig.S1C**

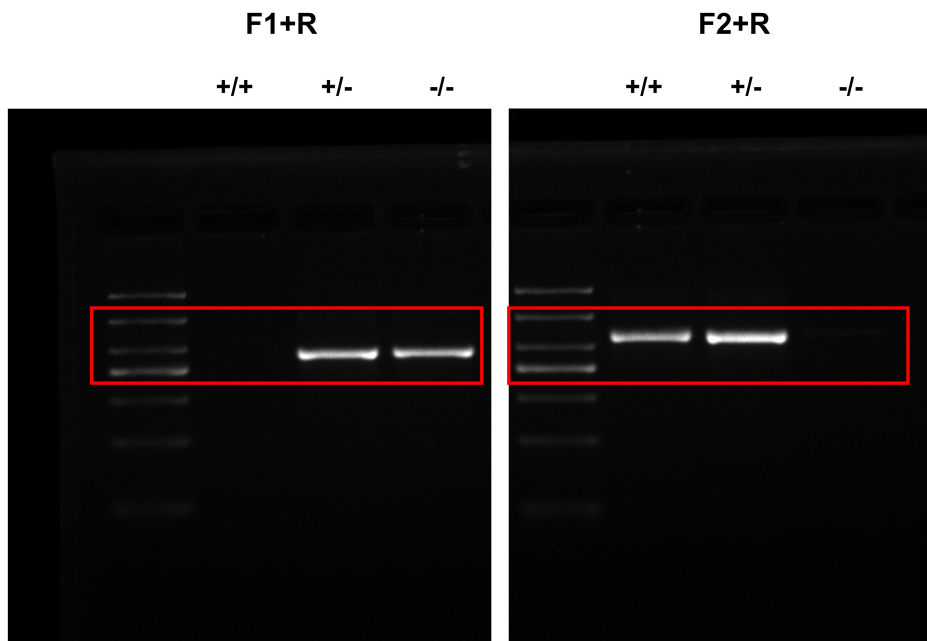

**Fig.S4A**

**FANCD2**

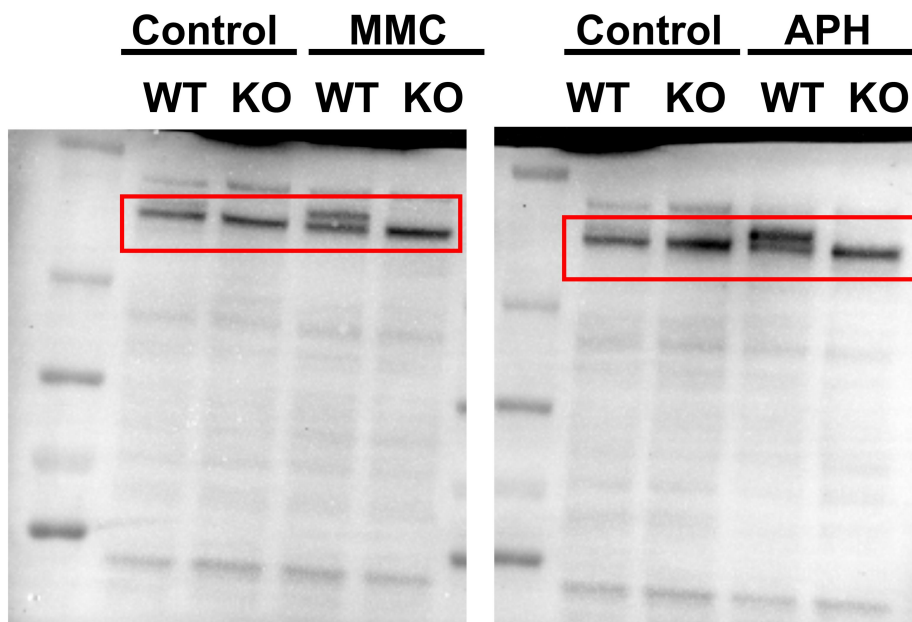

RPA2-s4/8-p

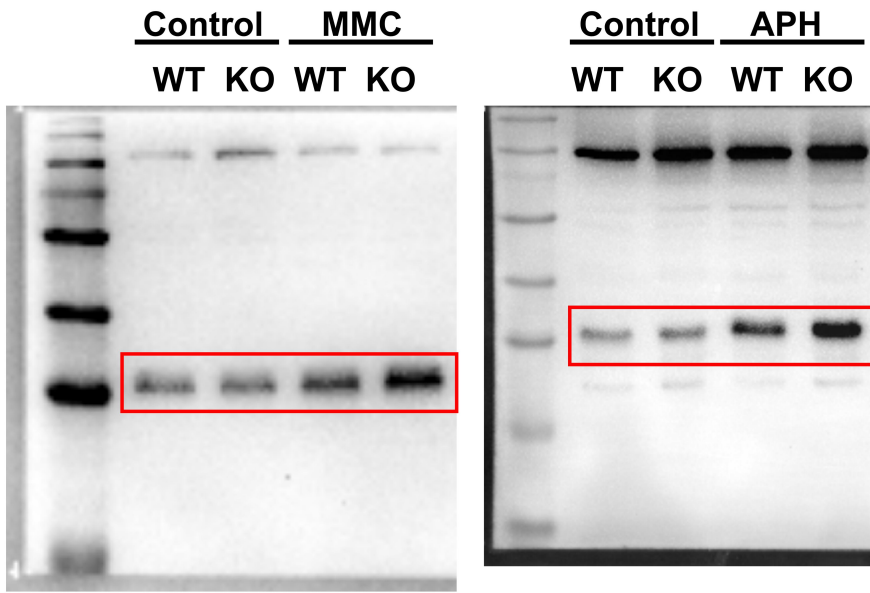

RPA

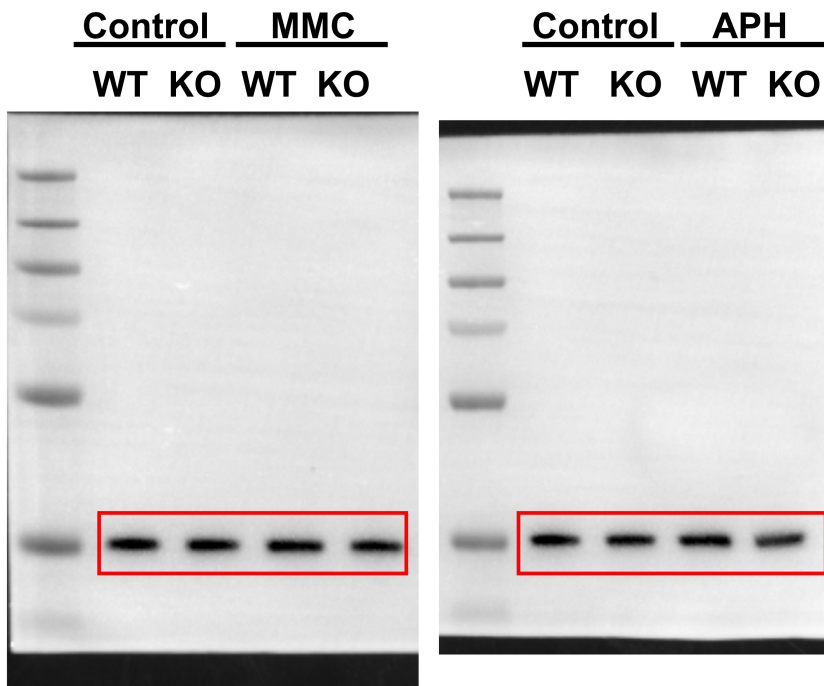

$\gamma$ H2AX

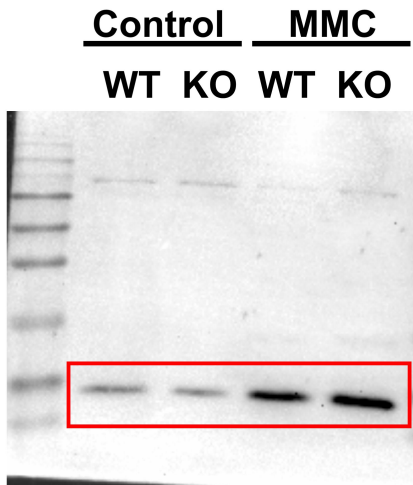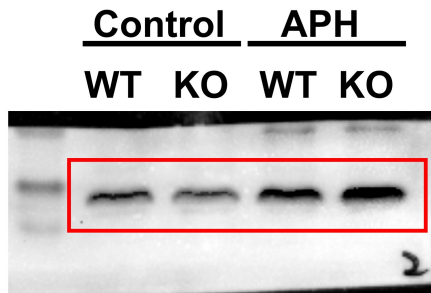

p-p53

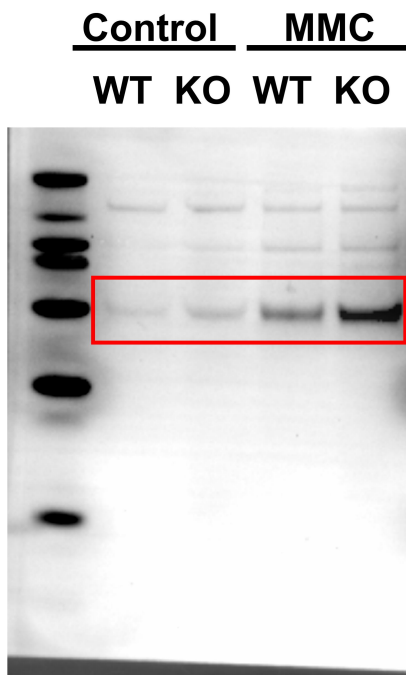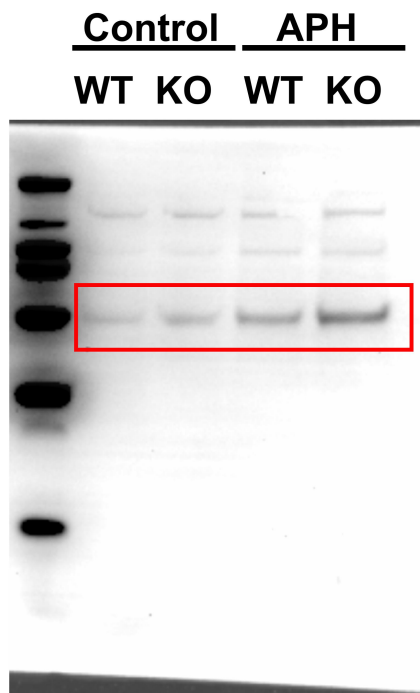

p53

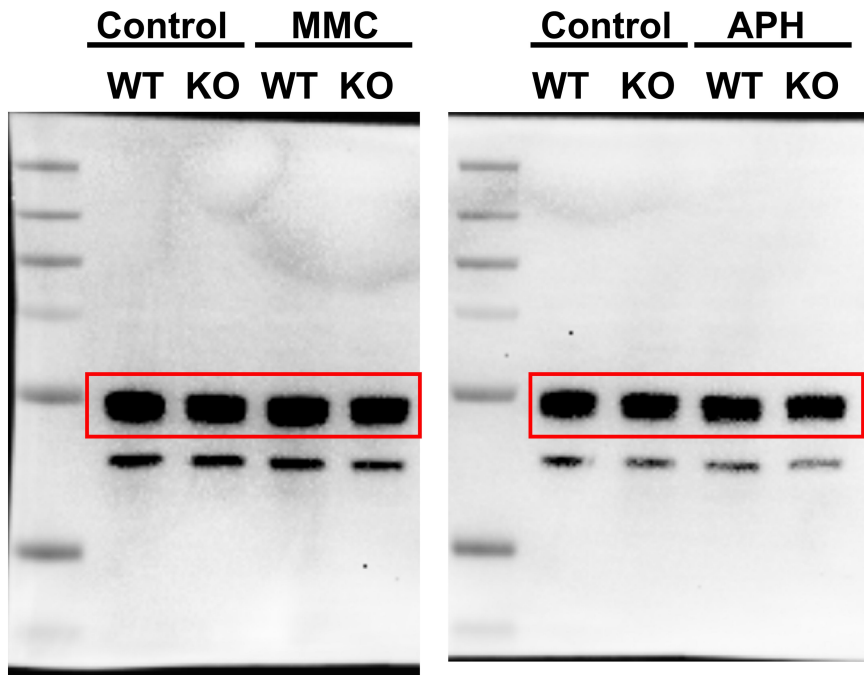

$\beta$ -ACTIN

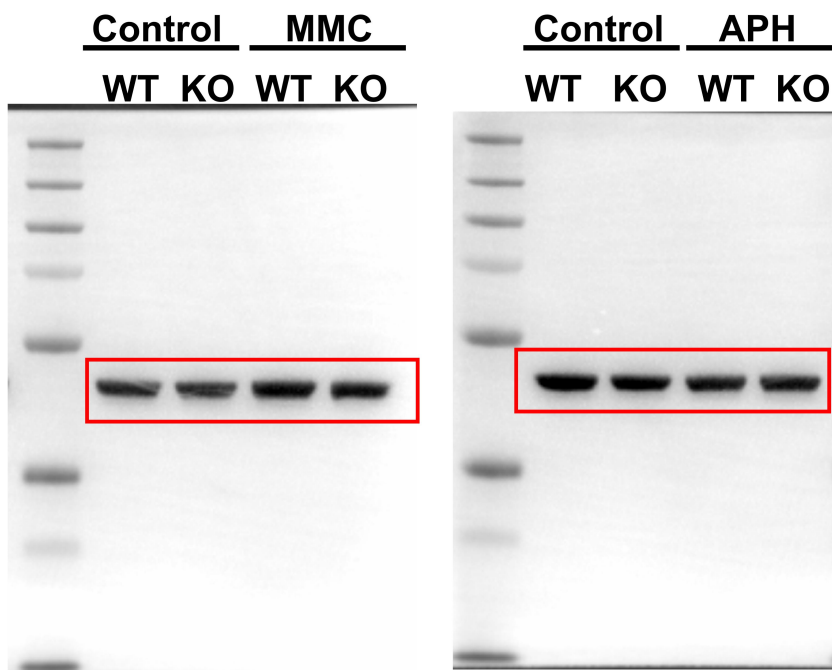

Supplement: 12915_2023_1676_MOESM8_ESM.pdf [file 12915_2023_1676_MOESM8_ESM.pdf]
